# Supplementary material for: Oxidation pathways and emission sources of atmospheric particulate nitrate in Seoul: based on δ 15 N and Δ 17 O measurements
Source: Copernicus journal article supplement (doi:10.5194/acp-22-5099-2022), 2022-04-19
Supplement: Supplementary file 1 [file acp-22-5099-2022-supplement.pdf]

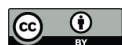

*Supplement of*

## **Oxidation pathways and emission sources of atmospheric particulate nitrate in Seoul: based on $\delta^{15}\text{N}$ and $\Delta^{17}\text{O}$ measurements**

**Saehee Lim et al.**

*Correspondence to:* Meehye Lee (meehye@korea.ac.kr)

The copyright of individual parts of the supplement might differ from the article licence.

Table S1. The number of stable isotope ratios.

| Period (year-month) | Number |
|---------------------|--------|
| 18-May              | 2      |
| 18-Jun              | 3      |
| 18-Jul              | 6      |
| 18-Aug              | 2      |
| 18-Dec              | 2      |
| 19-Jan              | 5      |
| 19-Feb              | 5      |
| 19-Mar              | 6      |
| Total number        | 31     |

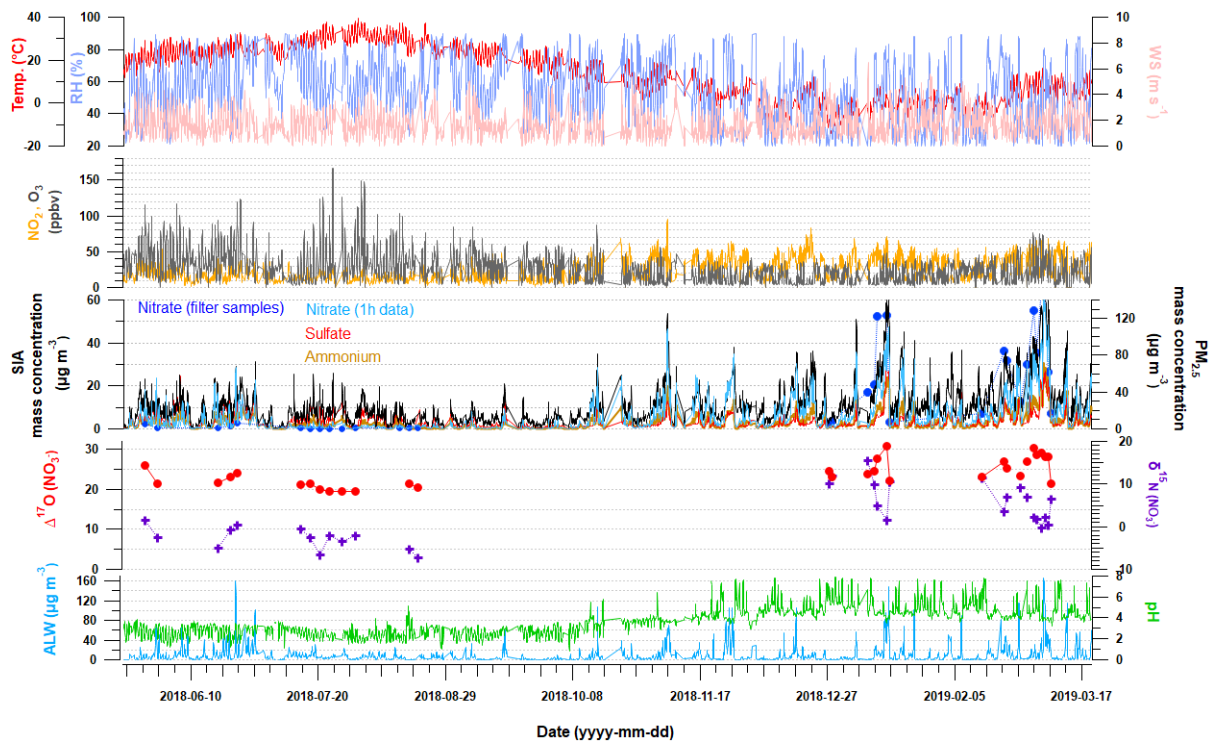

Figure S1. Time-series of measured parameters, including meteorological parameters (air temperature, relative humidity, and wind speed), gaseous precursors ( $\text{NO}_2$  and  $\text{O}_3$ ),  $\text{PM}_{2.5}$  mass and SIA ( $\text{NO}_3^-$ ,  $\text{SO}_4^{2-}$ , and  $\text{NH}_4^+$ ) concentrations, triple oxygen and nitrogen stable isotope ratios, and calculated ALW content and aerosol pH. All is 1h-averaged data, except stable isotope ratios and  $\text{NO}_3^-$  concentration, which are filter-based measurements.

a)

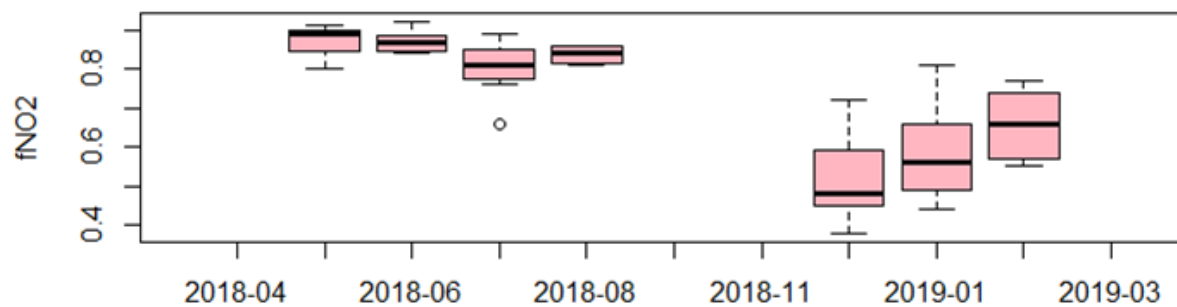

b)

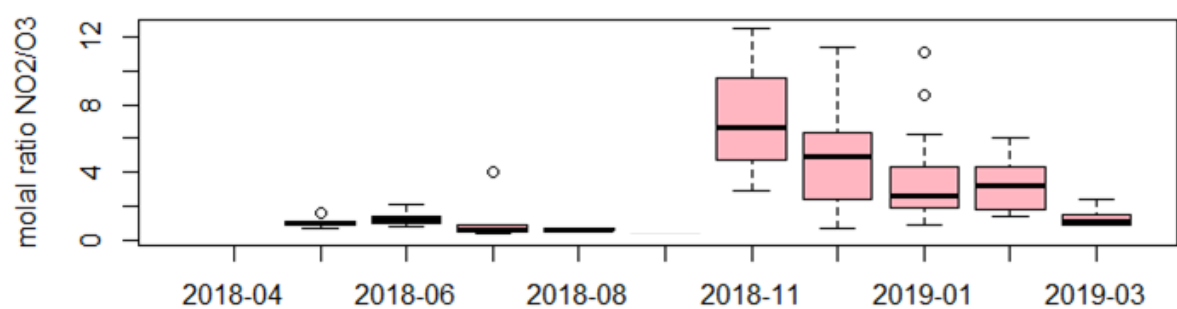

Figure S2. Monthly variations in (a)  $f_{\text{NO}_2}$  and (b) molar ratio of  $\text{NO}_2/\text{O}_3$  for the measurement periods of May-August 2018 and December 2018-March 2019.

a)

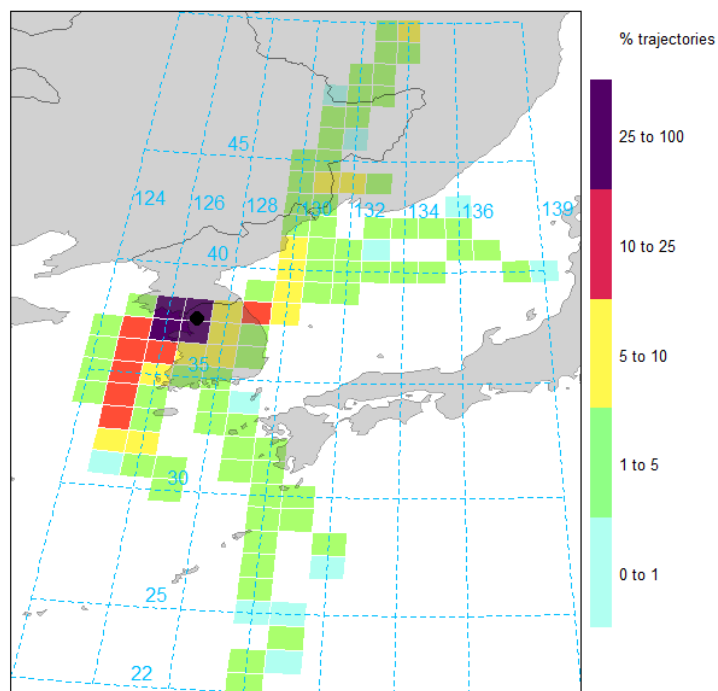

b)

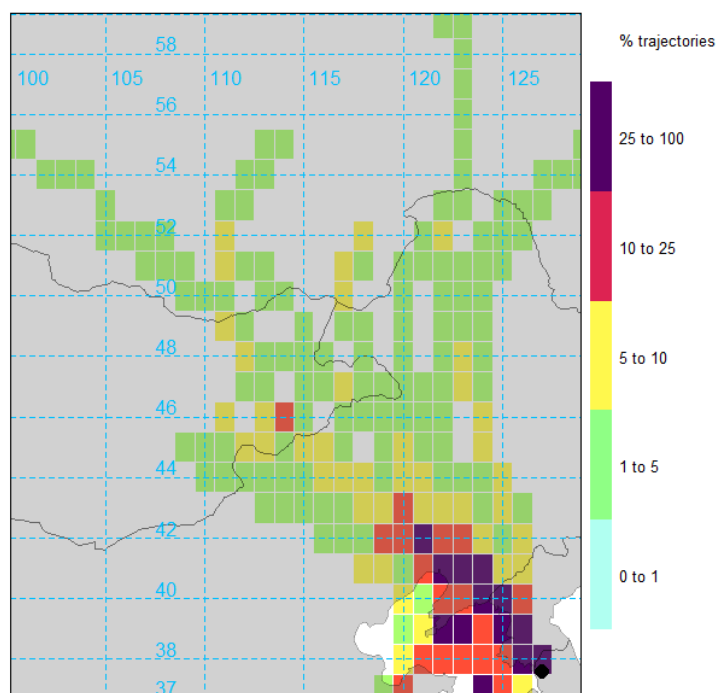

Figure S3. Frequency of air mass backward trajectories with (a)  $\delta^{15}\text{N}(\text{NO}_3^-)$  lower than 20<sup>th</sup> percentile and (b)  $\delta^{15}\text{N}(\text{NO}_3^-)$  higher than 80<sup>th</sup> percentile.
